# Supplementary material for: Assessing the analytical validity of SNP-chips for detecting very rare pathogenic variants: implications for direct-to-consumer genetic testing
Source: bioRxiv or medRxiv preprint supplement (doi:10.1101/696799), 2019-11-11

**Supplementary Figure 1.** Representative 2x2 tables for a common, rare and very variant in UKB.

|                       |                  | REFERENCE STANDARD (SEQUENCING)   |                  |                                  |                  |                                          |                  |
|-----------------------|------------------|-----------------------------------|------------------|----------------------------------|------------------|------------------------------------------|------------------|
|                       |                  | Common variant<br>(UKB MAF = 11%) |                  | Rare variant<br>(UKB MAF = 0.1%) |                  | Very rare variant<br>(UKB MAF = 0.0007%) |                  |
|                       |                  | Variant positive                  | Variant negative | Variant positive                 | Variant negative | Variant positive                         | Variant negative |
| INDEX TEST (SNP-CHIP) | Variant positive | 9109                              | 97               | 130                              | 1                | 0                                        | 1                |
|                       | Variant negative | 18                                | 36505            | 0                                | 45718            | 0                                        | 45870            |

**Supplementary Figure 2.** Precision of UKB BiLEVE SNP-chip for detecting variants at different population frequencies.

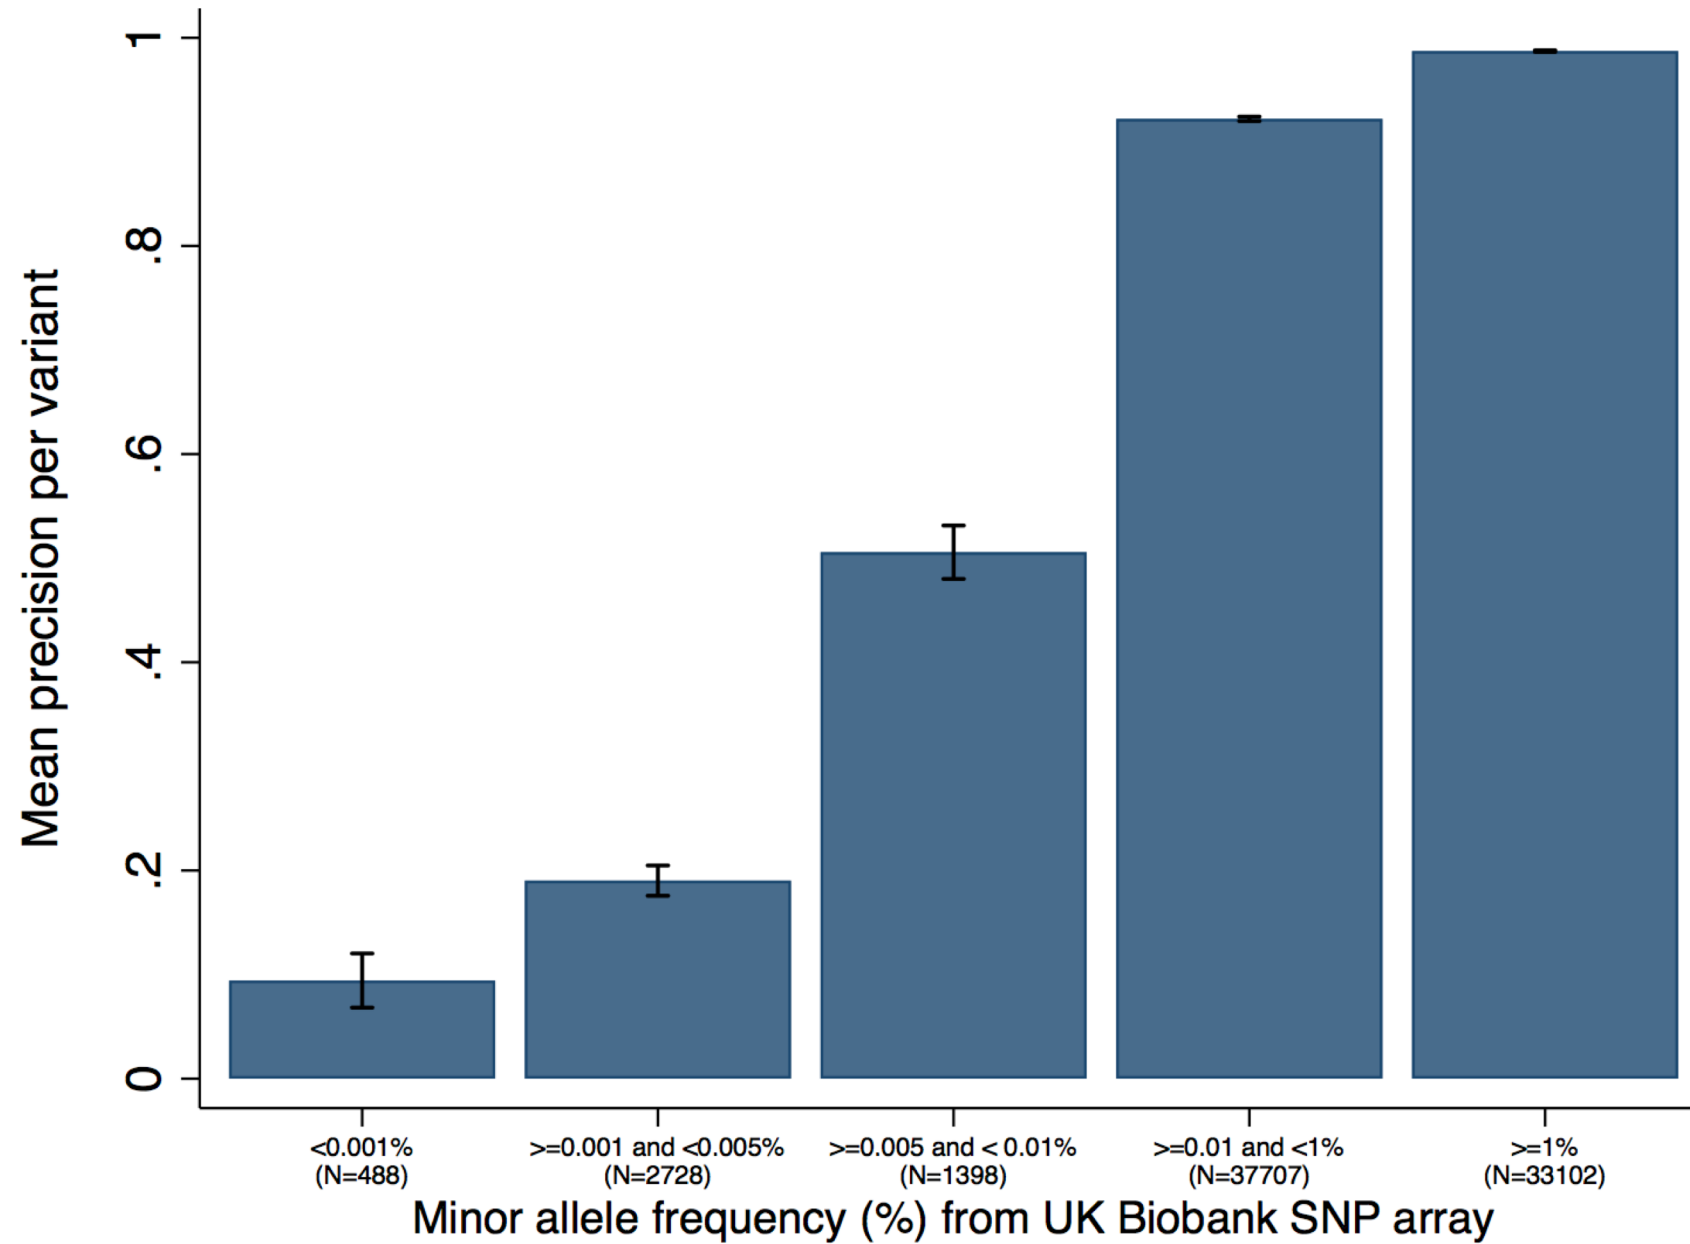

**Supplementary Figure 3.** Precision of PGP SNP-chips for detecting variants at different population frequencies.

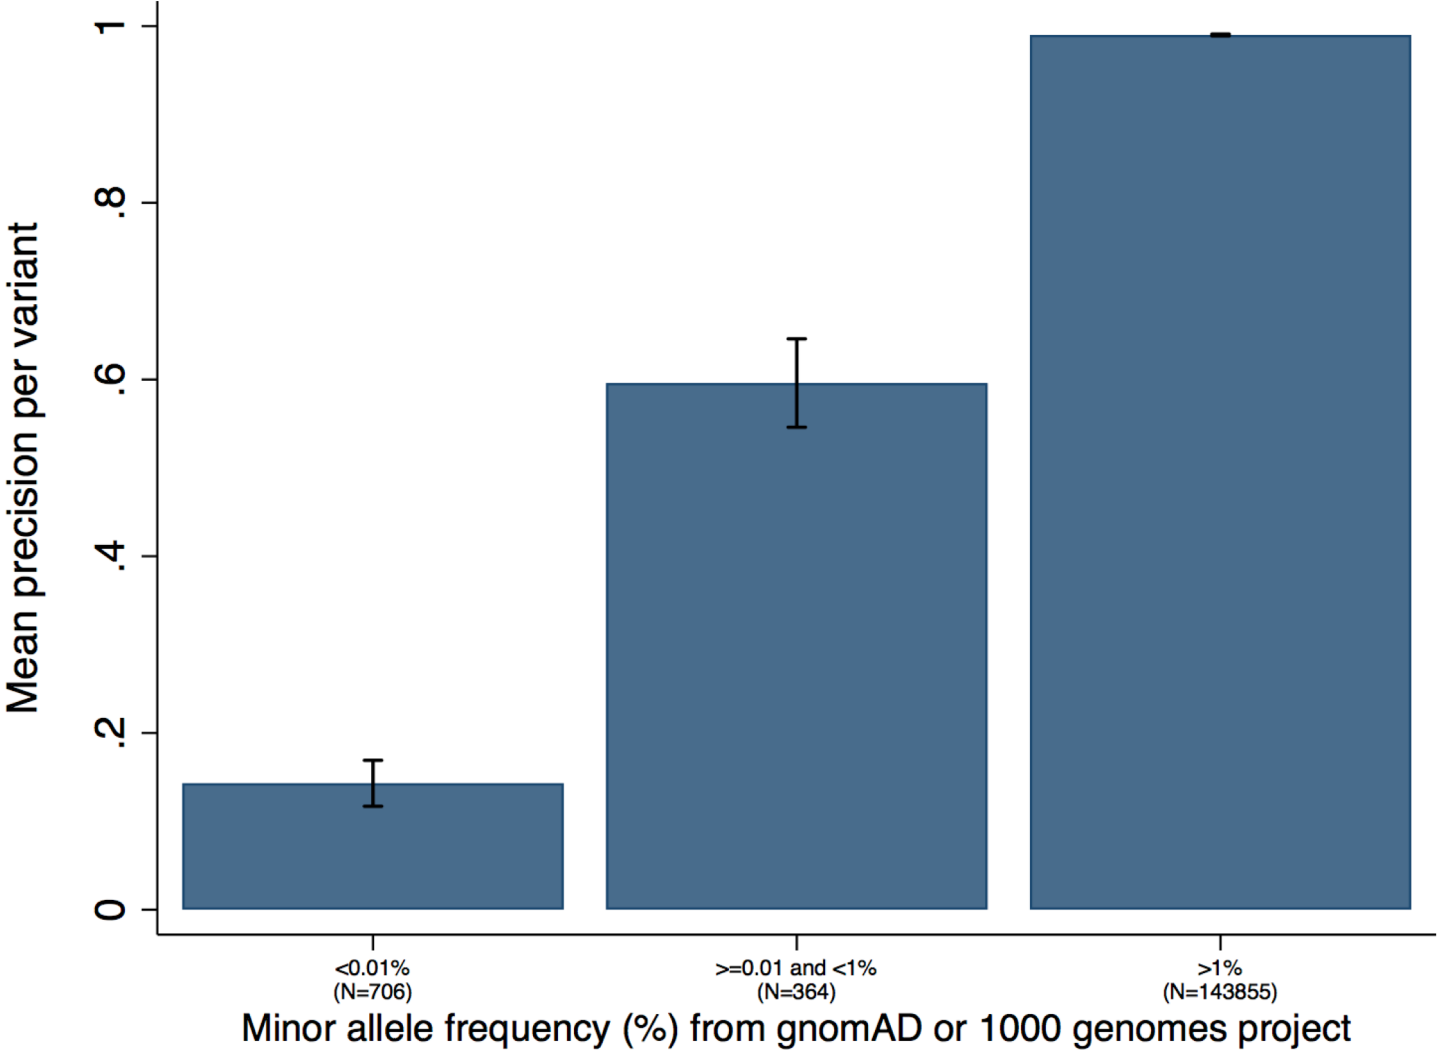

**Supplementary Figure 4.** STARD diagram to report flow of participants with a pathogenic BRCA variant on the UKB BiLEVE<sup>®</sup> chip compared with sequencing.

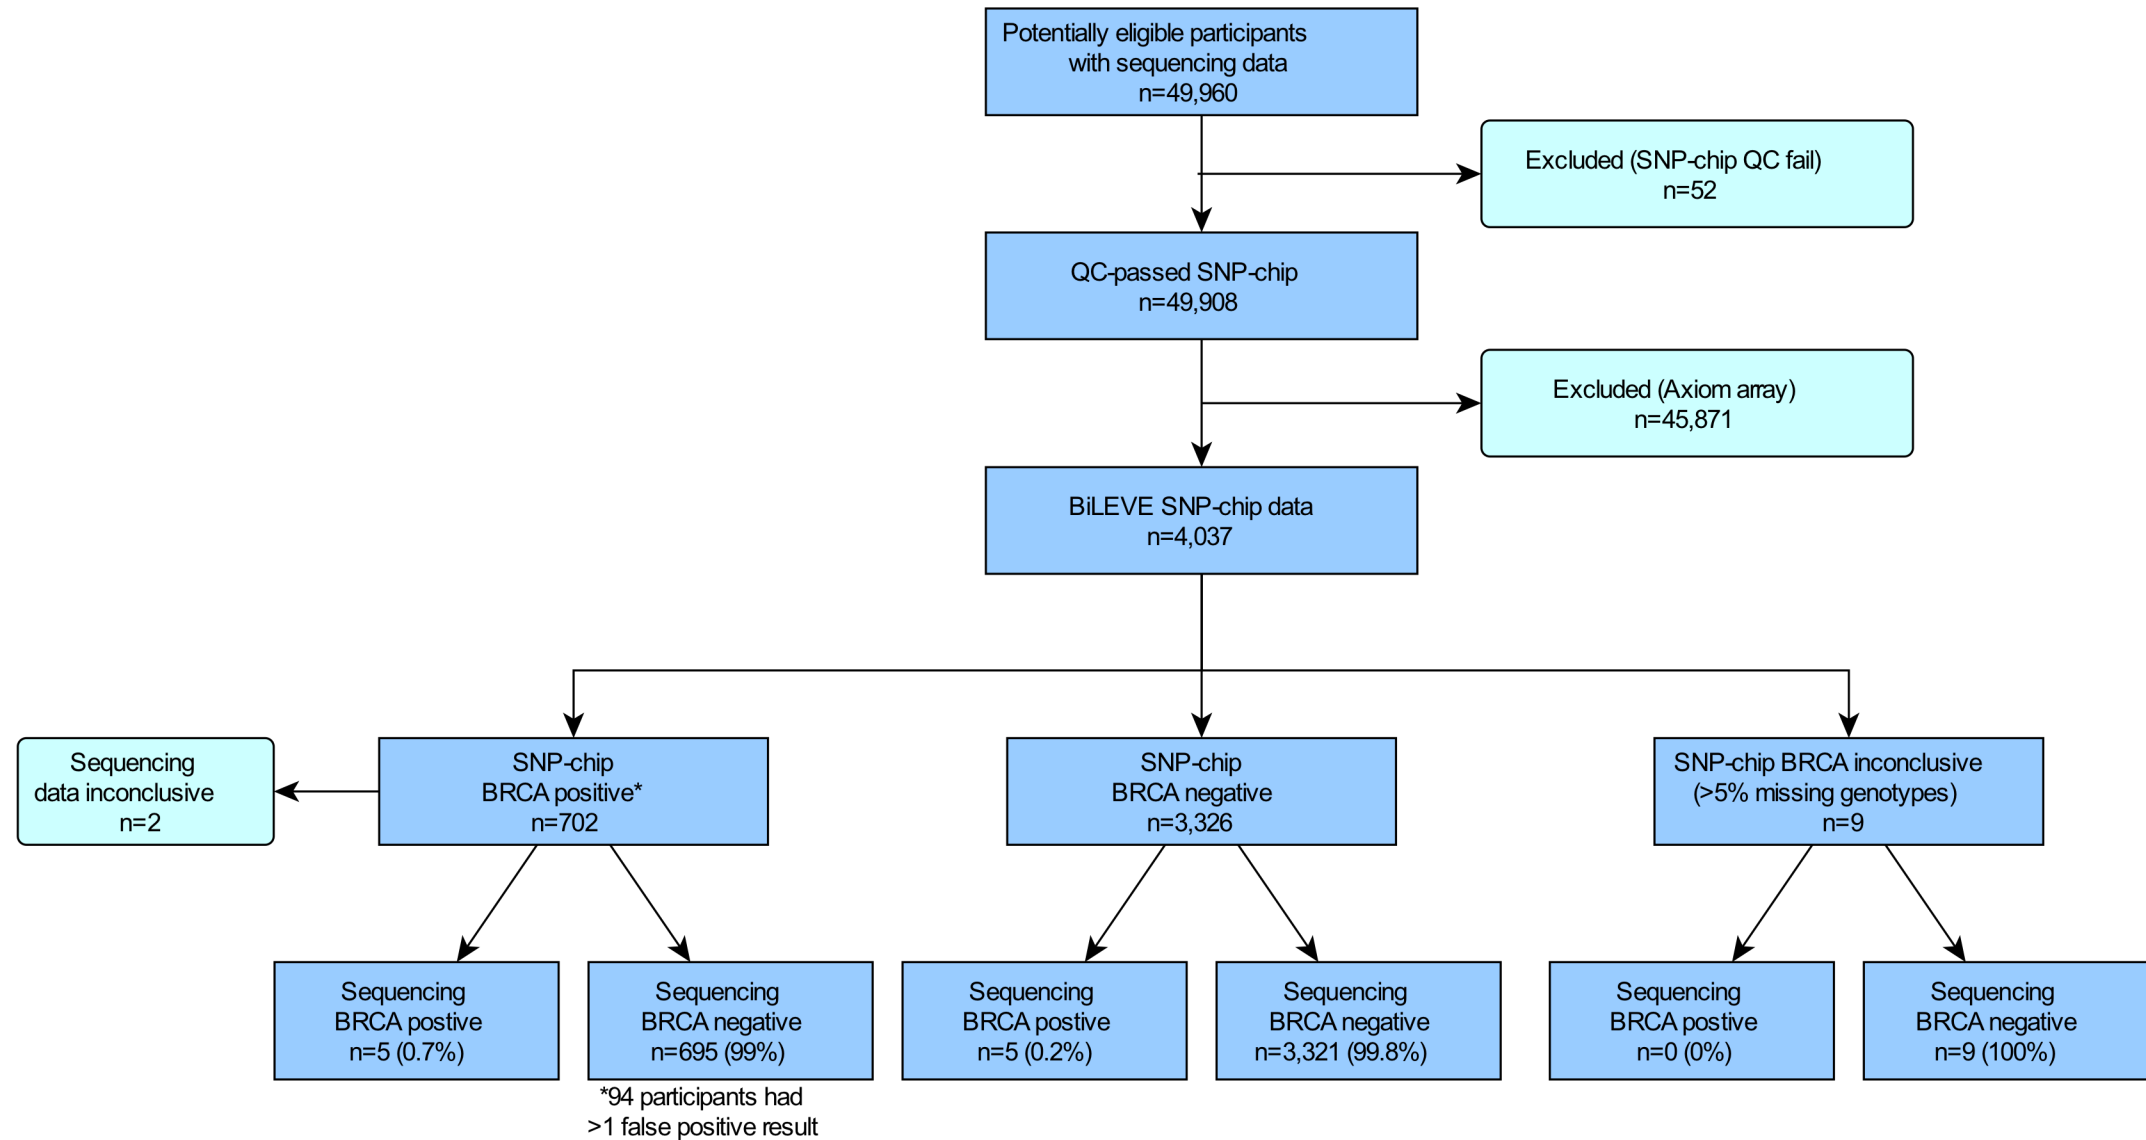

Supplement: Supplementary file [file media-1.pdf]
